# Supplementary material
Source: publisher site journal article supplement (https://www.dovepress.com/article/591789)
Supplement: Supplementary file 1 [file Revised_Supplementary%20Material_1.docx]

Appendix Table A1. The items used to construct the frailty index

| **No** | **Description of the item** | | | | **Cut-off value** |
| --- | --- | --- | --- | --- | --- |
| **CHARLS** | **ELSA** | **SHARE** | **MHAS** |
| 1 | Self-reported physician diagnosed hypertension | | | | Yes = 1, No = 0 |
| 2 | Self-reported physician diagnosed diabetes | | | | Yes = 1, No = 0 |
| 3 | Self-reported physician diagnosed cancer | | | | Yes = 1, No = 0 |
| 4 | Self-reported physician diagnosed heart disease | | | Self-reported physician diagnosed heart attack | Yes = 1, No = 0 |
| 5 | Self-reported physician diagnosed stroke | | | | Yes = 1, No = 0 |
| 6 | Self-reported physician diagnosed chronic lung disease | | | Not available | Yes = 1, No = 0 |
| 7 | Self-reported physician diagnosed any emotional, nervous, or psychiatric problems | | | Not available | Yes = 1, No = 0 |
| 8 | Self-reported physician diagnosed memory-related disease | | | Not available | Yes = 1, No = 0 |
| 9 | Self-reported general health status | | | | Very poor or poor = 1,  Very good, good, or fair = 0 |
| 10 | Difficulty with dressing | | | | Yes = 1, No = 0 |
| 11 | Difficulty with bathing or showering | | | | Yes = 1, No = 0 |
| 12 | Difficulty with eating | | | | Yes = 1, No = 0 |
| 13 | Difficulty with getting in and out of bed | | | | Yes = 1, No = 0 |
| 14 | Difficulty with using the toilet | | | | Yes = 1, No = 0 |
| 15 | Difficulty with managing money | | | | Yes = 1, No = 0 |
| 16 | Difficulty with taking medication | | | | Yes = 1, No = 0 |
| 17 | Difficulty with shopping for groceries | | | | Yes = 1, No = 0 |
| 18 | Difficulty with preparing meals | | | | Yes = 1, No = 0 |
| 19 | Depression: CESD-10 questionnaire | Depression: CESD-8 questionnaire | Depression: EURO-D-12 questionnaire | Depression: CESD-9 questionnaire | CESD-8 ≥ 4 = 1, < 4 = 0 in ELSA; EURO-D ≥ 4 = 1, < 4 = 0 in SHARE; CESD-10 ≥ 10 = 1, < 10 = 0 in CHARLS; CESD-9 ≥ 5 = 1, < 5 = 0 in MHAS |
| 20 | Cognition: (memory test score + orientation test score) / 14 | | | | Continuous variable, ranging  from 0 to 1 |

Note: Memory-related disease included Alzheimer’s disease, dementia, organic brain senility, and other serious memory impairment. Depressive symptoms were assessed using validated cohort-specific instruments, including CESD-10 (CHARLS), CESD-8 (ELSA), EURO-D (SHARE), and CESD-9 (MHAS), with higher scores indicating more severe symptoms. Cognitive function was assessed using harmonised memory and orientation measures.

Supplemental Table S1. Baseline characteristics of participants included in the two-wave analysis, by frailty status across four cohorts (CHARLS, ELSA, SHARE, MHAS)

| Variables | CHARLS (n = 4847) | | | ELSA (n = 5401) | | | SHARE (n = 5699) | | | MHAS (n = 2873) | | |
| --- | --- | --- | --- | --- | --- | --- | --- | --- | --- | --- | --- | --- |
|  | Robust | Pre-frail | Frail | Robust | Pre-frail | Frail | Robust | Pre-frail | Frail | Robust | Pre-frail | Frail |
| Number () | 3231 (66.7) | 1460 (30.1) | 156 (3.2) | 2825(52.3) | 2361 (43.7) | 215 (4.0) | 3506 (61.5) | 2001 (35.1) | 192 (3.4) | 1163 (40.4) | 1467 (51.1) | 243 (8.5) |
| Age, mean (SD), years | 58.1 (8.1) | 61.3 (8.6) | 64.6 (8.8) | 64.0 (8.0) | 67.1 (8.9) | 72.2 (11.4) | 64.4 (7.8) | 68.6 (8.6) | 70.3 (9.6) | 69.4 (6.1) | 69.0 (6.0) | 71.7 (7.3) |
| Sex, n () |  |  |  |  |  |  |  |  |  |  |  |  |
| Male | 1783 (55.2) | 738 (50.5) | 77 (49.4) | 1409 (49.9) | 1204 (51.0) | 103 (47.9) | 1586 (45.2) | 905 (45.2) | 73 (38.0) | 621 (53.4) | 507 (34.6) | 75 (30.9) |
| Female | 1448 (44.8) | 722 (49.5) | 79 (50.6) | 1416 (50.1) | 1157 (49.0) | 112 (52.1) | 1920 (54.8) | 1096 (54.8) | 119 (62.0) | 542 (46.6) | 960 (65.4) | 168 (69.1) |
| Marital status, n () |  |  |  |  |  |  |  |  |  |  |  |  |
| Married or partnered | 2958 (91.6) | 1288 (88.2) | 132 (84.6) | 2080 (73.6) | 1619 (68.6) | 102 (47.4) | 2401 (68.5) | 1289 (64.4) | 114 (59.4) | 795 (68.4) | 879 (59.9) | 142 (58.4) |
| Other marital status | 273 (8.4) | 172 (11.8) | 24 (15.4) | 745 (26.4) | 742 (31.4) | 113 (52.6) | 1105 (31.5) | 712 (35.6) | 78 (40.6) | 368 (31.6) | 588 (40.1) | 101 (41.6) |
| Education, n () |  |  |  |  |  |  |  |  |  |  |  |  |
| Below high school | 2711 (83.9) | 1247 (85.4) | 139 (89.1) | 788 (27.9) | 756 (32.0) | 89 (41.4) | 788 (22.5) | 701 (35.0) | 97 (50.5) | NA | NA | NA |
| High school | 370 (11.5) | 129 (8.8) | 11 (7.1) | 627 (22.2) | 527 (22.3) | 41 (19.1) | 1727 (49.3) | 892 (44.6) | 65 (33.9) | NA | NA | NA |
| College or above | 150 (4.6) | 84 (5.8) | 6 (3.8) | 1410 (49.9) | 1078 (45.7) | 85 (39.5) | 991 (28.3) | 408 (20.4) | 30 (15.6) | NA | NA | NA |
| Smoking status, n () |  |  |  |  |  |  |  |  |  |  |  |  |
| Ever smokers | 1512 (44.8) | 646 (44.2) | 73 (46.8) | 1666 (59.0) | 1467 (62.1) | 162 (75.3) | 1583 (44.5) | 947 (47.3) | 91 (47.6) | 458 (39.4) | 514 (35.0) | 82 (33.7) |
| Never smokers | 1719 (53.2) | 814 (55.8) | 83 (53.2) | 1159 (41.0) | 894 (37.9) | 53 (24.7) | 1918 (55.5) | 1054 (52.7) | 100 (52.4) | 705 (60.6) | 953 (65.0) | 161 (66.3) |
| Drinking_status |  |  |  |  |  |  |  |  |  |  |  |  |
| Ever drinkers | 1610 (48.3) | 685 (46.9) | 60 (38.5) | 2416 (85.5) | 1957 (82.9) | 168 (78.1) | 2556 (72.9) | 1204 (60.2) | 119 (62.0) | 856 (73.4) | 1187 (80.9) | 220 (90.5) |
| Never drinkers | 1671 (51.7) | 775 (53.1) | 96 (61.5) | 409 (14.5) | 404 (17.1) | 47 (21.9) | 950 (27.1) | 797 (39.8) | 73 (38.2) | 306 (26.3) | 280 (19.1) | 23 (9.5) |
| Physical_activity |  |  |  |  |  |  |  |  |  |  |  |  |
| Light | 1011 (31.0) | 588 (40.3) | 91 (58.3) | 205 (7.3) | 296 (12.5) | 134 (62.3) | 74 (2.1) | 137 (6.8) | 68 (35.4) | NA | NA | NA |
| Moderate | 1033 (32.0) | 422 (28.9) | 40 (25.6) | 1203 (42.6) | 1028 (43.5) | 65 (30.2) | 928 (26.5) | 729 (36.4) | 68 (35.4) | NA | NA | NA |
| Vigorous | 1197 (37.0) | 450 (30.8) | 25 (16.0) | 1417 (50.1) | 1037 (44.0) | 16 (7.4) | 2504 (71.4) | 1135 (56.7) | 56 (29.2) | NA | NA | NA |
| BMI | 23.7 (5.5) | 24.5 (3.8) | 23.8 (3.5) | 29.4 (6.4) | 27.9 (4.9) | 27.3 (4.7) | 29.4 (5.2) | 28.2 (4.7) | 26.2 (4.1) | 28.1 (5.2) | 27.6 (4.7) | 26.5 (4.6) |

Note: Values are n (%) or mean (SD). Percentages are calculated within each frailty group. NA indicates not available. Education and physical activity were not available in MHAS. Variables were harmonized across cohorts where possible.

Supplementary Table S2 Association between total frailty index tertiles and incident arthritis across four cohorts (CHARLS, ELSA, SHARE, MHAS): crude hazard ratios (HR1)

| **Frailty transition** | **CHARLS (n=4847)** | | | **ELSA (n=5401)** | | | **SHARE (n=5699)** | | | **MHAS (n=2873)** | | |
| --- | --- | --- | --- | --- | --- | --- | --- | --- | --- | --- | --- | --- |
|  | Events/n | HR1 (95% CI) | P | Events/n | HR1 (95% CI) | P | Events/n | HR1 (95% CI) | P | Events/n | HR1 (95% CI) | P |
| T1 of total FI | 417/1603 | Ref. | - | 283/1732 | Ref. | - | 370/1897 | Ref. | - | 90/958 | Ref. | - |
| T2 of total FI | 411/1624 | 0.97 (0.85–1.11) | 0.688 | 285/1851 | 0.95 (0.81–1.12) | 0.573 | 468/1887 | 1.25 (1.09–1.43) | 0.001 | 116/956 | 1.31 (0.99–1.72) | 0.056 |
| T3 of total FI | 509/1620 | 1.26 (1.10–1.43) | <.001 | 312/1818 | 1.20 (1.03–1.41) | 0.023 | 616/1915 | 1.61 (1.41–1.83) | <.001 | 173/959 | 2.01 (1.56–2.59) | <.001 |
| P for trend test | <0.001 | | | 0.023 | | | <0.001 | | | <0.001 | | |

Note: Ref. = reference group (T1, lowest tertile of frailty index). HR1 = unadjusted hazard ratio. Detailed multivariable-adjusted results are shown in the main text Table 4.

Supplementary Table S3 Association between changes in frailty status and incident arthritis across four cohorts: unadjusted hazard ratios (HR1)

| **Frailty transition** | **CHARLS (n=4847)** | | | **ELSA (n=5401)** | | | **SHARE (n=5699)** | | | **MHAS (n=2873)** | | |
| --- | --- | --- | --- | --- | --- | --- | --- | --- | --- | --- | --- | --- |
|  | Events/n | HR1 (95% CI) | P | Events/n | HR1 (95% CI) | P | Events/n | HR1 (95% CI) | P | Events/n | HR1 (95% CI) | P |
| Stable robust | 666/2708 | Ref. |  | 388/2490 | Ref. |  | 688/3293 | Ref. |  | 86/914 | Ref. |  |
| Robust → pre-frail/frail | 165/555 | 1.25 (1.06–1.48) | 0.010 | 97/628 | 1.12 (0.89–1.39) | 0.332 | 276/906 | 1.41 (1.22–1.62) | <.001 | 92/690 | 1.45 (1.08–1.95) | 0.013 |
| Stable pre-frail | 269/882 | Ref. |  | 279/1704 | Ref. |  | 339/1083 | Ref. |  | 119/822 | Ref. |  |
| Pre-frail → robust | 152/494 | 1.01 (0.83–1.23) | 0.937 | 71/332 | 1.28 (0.99–1.66) | 0.065 | 56/210 | 0.88 (0.67–1.17) | 0.388 | 29/242 | 0.82 (0.54–1.22) | 0.326 |
| Pre-frail → frail | 24/68 | 1.23 (0.81–1.87) | 0.333 | 19/110 | 2.04 (1.28–3.26) | 0.003 | 276/906 | 1.41 (1.22–1.62) | <.001 | 41/144 | 2.13 (1.49–3.04) | <.001 |
| Stable frail | 25/52 | Ref. |  | 17/86 | Ref. |  | 23/51 | Ref. |  | 5/29 | Ref. |  |
| Frail → robust/pre-frail | 36/88 | 0.82 (0.49–1.37) | 0.451 | 9/51 | 0.56 (0.25–1.25) | 0.155 | 18/46 | 0.96 (0.52–1.78) | 0.890 | 7/32 | 1.29 (0.41–4.06) | 0.665 |

Note: Ref. = reference group within each baseline frailty stratum (stable robust, stable pre-frail, or stable frail, as appropriate). HR1 = unadjusted hazard ratio. The multivariable-adjusted hazard ratios (HR2) are presented in the main text Table 4.

Supplementary Table S4 Association between tertiles of changes in frailty index (ΔFI) and incident arthritis across four cohorts (CHARLS, ELSA, SHARE, MHAS)

| **ΔFI tertiles** | **CHARLS (n=4847)** | | | **ELSA (n=5401)** | | | **SHARE (n=5699)** | | | **MHAS (n=2873)** | | |
| --- | --- | --- | --- | --- | --- | --- | --- | --- | --- | --- | --- | --- |
|  | Events/n | HR1 (95% CI) | P | Events/n | HR1 (95% CI) | P | Events/n | HR1 (95% CI) | P | Events/n | HR1 (95% CI) | P |
| T1 of ΔFI | 472/1600 | Ref. |  | 292/1775 | Ref. |  | 437/1759 | Ref. |  | 121/952 | Ref. |  |
| T2 of ΔFI | 397/1626 | 0.80 (0.70–0.92) | 0.001 | 283/1818 | 0.90 (0.76–1.06) | 0.203 | 447/2040 | 0.88 (0.77–1.01) | 0.063 | 105/955 | 0.86 (0.66–1.11) | 0.252 |
| T3 of ΔFI | 468/1621 | 0.98 (0.86–1.11) | 0.713 | 305/1808 | 1.09 (0.93–1.28) | 0.283 | 570/1900 | 1.19 (1.05–1.34) | 0.007 | 153/966 | 1.27 (1.00–1.61) | 0.049 |
| P for trend test | 0.716 | | | 0.283 | | | 0.004 | | | 0.539 | | |

Note: Ref. = reference group (T1 of ΔFI, i.e., the lowest tertile of frailty index change). HR1 = multivariable-adjusted hazard ratios.

Supplementary Table S5 Baseline frailty status and incident arthritis under alternative FI cut-offs (adjusted HRs)

| **Cohort** | **Cut-off 1** | | **Cut-off 2** | | **N** | **Events** |
| --- | --- | --- | --- | --- | --- | --- |
| **HR2 (95% CI)** | **P for trend** | **HR2 (95% CI)** | **P for trend** |
| CHARLS | 1.86 (1.53–2.27) | <.001 | 1.83 (1.41–2.38) | <.001 | 4847 | 1337 |
| ELSA | 1.62 (1.20–2.19) | <.001 | 1.66 (1.11–2.49) | 0.004 | 5401 | 880 |
| SHARE | 1.26 (0.99–1.60) | 0.055 | 1.19 (0.90–1.58) | 0.217 | 5699 | 1454 |
| MHAS | 1.44 (1.02–2.03) | <.001 | 1.81 (0.98–3.32) | 0.056 | 2873 | 379 |

Note: The analysis presented uses the Frail versus Robust contrast. HR is adjusted for age, sex, marital status, education, smoking, drinking, and physical activity. The alternative FI cut-off schemes are defined as follows: Cut-off 1: Frail ≥ 0.21, pre-frail 0.10–0.21, robust ≤ 0.10.Cut-off 2: Frail ≥ 0.25, pre-frail 0.08–0.24, robust ≤ 0.08.

Supplementary Table S6 Complete case versus multiple imputation estimates for key contrasts (adjusted HRs)

| **Cohort** | **Contrast** | **HR2 (95% CI) MI** | **HR2 (95% CI) CC** | **Δ%** | **Sig. pattern** | **N (MI) / (CC)** | **Events (MI) / (CC)** |
| --- | --- | --- | --- | --- | --- | --- | --- |
| CHARLS | T3 vs T1 (baseline FI) | 1.18 (1.04–1.34) | 1.25 (1.02–1.54) | 5.9% | unchanged | 4847 / 1824 | 1337 / 529 |
| Robust→Pre-frail/frail vs Stable robust | 1.22 (1.02–1.45) | 1.28 (0.98–1.67) | 4.9% | attenuated | 3263 / 1252 | 831 / 337 |
| ELSA | T3 vs T1 (baseline FI) | 1.11 (0.95–1.31) | 1.01 (0.80–1.26) | -9.0% | unchanged | 5401 / 2747 | 880 / 459 |
| Robust→Pre-frail/frail vs Stable robust | 1.04 (0.83–1.31) | 1.10 (0.82–1.48) | 5.8% | unchanged | 3118 / 1673 | 485 / 268 |
| SHARE | T3 vs T1 (baseline FI) | 1.24 (1.08–1.42) | 1.23 (1.07–1.41) | -0.8% | unchanged | 5699 / 5604 | 1454 / 1430 |
| Robust→Pre-frail/frail vs Stable robust | 1.26 (1.09–1.46) | 1.26 (1.09–1.47) | 0.0% | unchanged | 4199 / 4131 | 964 / 954 |
| MHAS | T3 vs T1 (baseline FI) | 1.41 (1.08–1.83) | 1.26 (0.92–1.73) | -10.6% | attenuated | 2873 / 2100 | 379 / 265 |
| Robust→Pre-frail/frail vs Stable robust | 1.29 (0.96–1.74) | 1.19 (0.83–1.70) | -7.8% | unchanged | 1604 / 1178 | 178 / 125 |

Note: MI = Multiple Imputation; CC = Complete Case. HR (Hazard Ratios) were adjusted for age, sex, marital status, education, smoking, drinking, and physical activity. **Δ%** is calculated as (HRCC - HRMI) / HRMI ×100%. Sig. The pattern summarizes the change in statistical significance (P < 0.05) between the MI and CC estimates.
